# Supplementary material for: MatPred: Computational Identification of Mature MicroRNAs within Novel Pre-MicroRNAs
Source: PubMed Central journal article supplement (PMC4670854; doi:10.1155/2015/546763), 2015-11-23

A

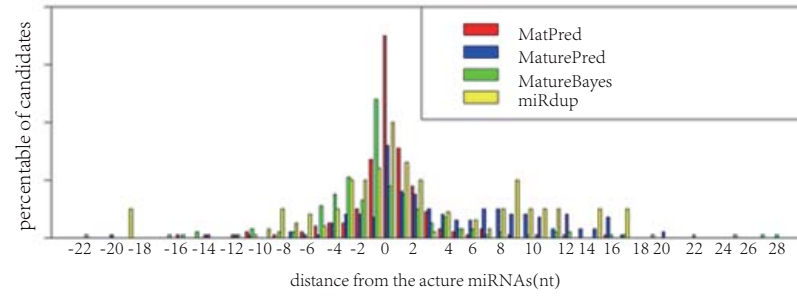

B

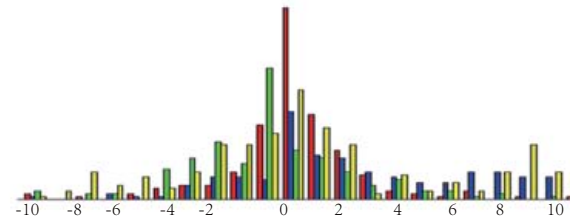

Supplement: 546763.f1.pdf [file 546763.f1.pdf]
